# Supplementary material for: Gut Microbiome-Based Analysis of Lipid A Biosynthesis in Individuals with Autism Spectrum Disorder: An In Silico Evaluation
Source: PubMed Central journal article supplement (PMC7924848; doi:10.3390/nu13020688), 2021-02-21
Supplement: nutrients-13-00688-s001.pdf [file nutrients-13-00688-s001.pdf]

**Supplementary Table S1.** Most abundant genera in control (MAG0) and their strains % distribution.

| Genus                         | AVD     | LpxA  | LpxC  | LpxD  | LpxH  | LpxB  | LpxK  | WaaA | LpxL | LpxM |
|-------------------------------|---------|-------|-------|-------|-------|-------|-------|------|------|------|
| <i>Bacteroides</i>            | 40.1988 | 2.39  | 96.06 | 91.96 | 2.38  | 62.68 | 98.26 | 0    | 100  | 100  |
| <i>Alistipes</i>              | 13.1825 | 3.08  | 93.02 | 95.45 | 4.26  | 48.89 | 95.35 | 100  | 0    | 0    |
| <i>Faecalibacterium</i>       | 5.4047  | 0     | 0     | 0     | 0     | 0     | 0     | 0    | 0    | 0    |
| <i>Parabacteroides</i>        | 4.4801  | 2.71  | 96    | 98.28 | 0.6   | 64.41 | 98.31 | 100  | 0    | 0    |
| <i>Dialister</i>              | 2.3337  | 17.65 | 88.24 | 92.86 | 0     | 40    | 88.24 | 0    | 0    | 0    |
| <i>Sutterella</i>             | 1.6737  | 19.79 | 64.52 | 100   | 80.95 | 100   | 89.47 | 0    | 0    | 0    |
| <i>Oscillibacter</i>          | 1.4705  | 0     | 0     | 0     | 0     | 0     | 0     | 0    | 0    | 0    |
| <i>Bacteroidales_noname</i>   | 1.1350  | 61.52 | 69.64 | 37.5  | 44.44 | 19.35 | 56.9  | 0    | 0    | 0    |
| <i>Odoribacter</i>            | 1.0652  | 16.67 | 100   | 84.62 | 0     | 11.11 | 100   | 0    | 0    | 0    |
| <i>Prevotella</i>             | 1.0291  | 4.57  | 97.33 | 65.55 | 2.52  | 54.55 | 98.51 | 0    | 0    | 0    |
| <i>Blautia</i>                | 0.9643  | 0     | 0     | 0     | 0     | 0     | 0     | 0    | 0    | 0    |
| <i>Akkermansia</i>            | 0.8059  | 6.49  | 81.25 | 87.5  | 0     | 15.79 | 75    | 0    | 0    | 0    |
| <i>Paraprevotella</i>         | 0.7158  | 2.44  | 75    | 75    | 0     | 66.67 | 100   | 0    | 0    | 0    |
| <i>Bilophila</i>              | 0.6073  | 12.5  | 100   | 100   | 0     | 0     | 100   | 0    | 0    | 0    |
| <i>Lachnospiraceae_noname</i> | 0.5326  | 0.67  | 0     | 0     | 0     | 100   | 100   | 0    | 0    | 0    |

Abbreviations: AVD, average value distribution.

**Supplementary Table S2.** Most abundant genera in ASD (MAG) and their strains % distribution.

| Genus                         | AVD     | LpxA  | LpxC  | LpxD  | LpxH  | LpxB  | LpxK  | WaaA  | LpxL  | LpxM  |
|-------------------------------|---------|-------|-------|-------|-------|-------|-------|-------|-------|-------|
| <i>Bacteroides</i>            | 43.9726 | 2.39  | 96.06 | 91.96 | 2.38  | 62.68 | 98.26 | 0     | 100   | 100   |
| <i>Alistipes</i>              | 14.7629 | 3.08  | 93.02 | 95.45 | 4.26  | 48.89 | 95.35 | 100   | 0     | 0     |
| <i>Faecalibacterium</i>       | 4.2211  | 0     | 0     | 0     | 0     | 0     | 0     | 0     | 0     | 0     |
| <i>Parabacteroides</i>        | 2.8816  | 2.71  | 96    | 98.28 | 0.6   | 64.41 | 98.31 | 100   | 0     | 0     |
| <i>Dialister</i>              | 2.4613  | 17.65 | 88.24 | 92.86 | 0     | 40    | 88.24 | 0     | 0     | 0     |
| <i>Oscillibacter</i>          | 2.1972  | 0     | 0     | 0     | 0     | 0     | 0     | 0     | 0     | 0     |
| <i>Lachnospiraceae_noname</i> | 1.5793  | 0.67  | 0     | 0     | 0     | 100   | 100   | 0     | 0     | 0     |
| <i>Akkermansia</i>            | 1.5705  | 6.49  | 81.25 | 87.5  | 0     | 15.79 | 75    | 0     | 0     | 0     |
| <i>Blautia</i>                | 1.1117  | 0     | 0     | 0     | 0     | 0     | 0     | 0     | 0     | 0     |
| <i>Haemophilus</i>            | 0.8035  | 14.75 | 51.19 | 98.92 | 90.48 | 99.04 | 99    | 96.88 | 49.18 | 50.83 |
| <i>Bacteroidales_noname</i>   | 0.7764  | 61.52 | 69.64 | 37.5  | 44.44 | 19.35 | 56.9  | 0     | 0     | 0     |
| <i>Prevotella</i>             | 0.6930  | 4.57  | 97.33 | 65.55 | 2.52  | 54.55 | 98.51 | 0     | 0     | 0     |
| <i>Sutterella</i>             | 0.5924  | 19.79 | 64.52 | 100   | 80.95 | 100   | 89.47 | 0     | 0     | 0     |
| <i>Escherichia</i>            | 0.5787  | 4.91  | 43.43 | 85.53 | 49.5  | 93.91 | 96.42 | 100   | 31.18 | 43.63 |
| <i>Odoribacter</i>            | 0.5664  | 16.67 | 100   | 84.62 | 0     | 11.11 | 100   | 0     | 0     | 0     |

Abbreviations: AVD, average value distribution; ASD, autism spectrum disorder.

**Supplementary Table S3.** Most increased genera (MIG) and their strains % distribution.

| Genus                         | AVD-CN   | AVD-ASD | %Increase | LpxA  | LpxC  | LpxD  | LpxH  | LpxB  | LpxK  | WaaA | LpxL  | LpxM  |
|-------------------------------|----------|---------|-----------|-------|-------|-------|-------|-------|-------|------|-------|-------|
| <i>Acidaminococcus</i>        | 8.86E-05 | 0.0057  | 6409.81   | 19.05 | 57.14 | 87.5  | 0     | 62.5  | 80    | 0    | 0     | 0     |
| <i>Megasphaera</i>            | 0.0053   | 0.1523  | 2774.09   | 11.11 | 100   | 100   | 0     | 71.43 | 95.45 | 100  | 0     | 0     |
| <i>Porphyromonas</i>          | 0.0002   | 0.0042  | 1352.23   | 6.93  | 100   | 100   | 4.35  | 34.88 | 100   | 100  | 100   | 0     |
| <i>Klebsiella</i>             | 0.0134   | 0.1672  | 1144.98   | 5.56  | 49.21 | 97.73 | 50.56 | 89.94 | 97.18 | 100  | 45.8  | 27.08 |
| <i>Burkholderiales_noname</i> | 0.0608   | 0.4617  | 658.58    | 9.51  | 46.46 | 90.91 | 34.88 | 88.46 | 90.2  | 100  | 0     | 0     |
| <i>Citrobacter</i>            | 0.0007   | 0.0034  | 383.44    | 5.45  | 47.52 | 83.33 | 52.94 | 95.08 | 95.95 | 100  | 31.38 | 34.44 |
| <i>Neisseria</i>              | 0.0008   | 0.0039  | 354.85    | 13.03 | 48.42 | 98.11 | 94.23 | 97.12 | 97.98 | 100  | 100   | 0     |
| <i>Actinobacillus</i>         | 0.0004   | 0.0017  | 242.33    | 13.44 | 52.08 | 88.46 | 96.15 | 88.89 | 92.31 | 100  | 51.02 | 51.06 |
| <i>Enterobacter</i>           | 0.0802   | 0.2407  | 199.98    | 6.53  | 48.35 | 52    | 95    | 95.2  | 98.61 | 100  | 44.16 | 25.78 |
| <i>Lachnospiraceae_noname</i> | 0.5326   | 1.5793  | 196.52    | 0.67  | 0     | 0     | 0     | 100   | 100   | 0    | 0     | 0     |

Abbreviations: AVD, average value distribution; ASD, autism spectrum disorder; CN, control.

**Supplementary Table S4.** Most abundant species in control and individuals with ASD.

| SPECIES                             | AVD-CN | SPECIES                      | AVD-ASD |
|-------------------------------------|--------|------------------------------|---------|
| <i>Bacteroides uniformis</i>        | 8.2699 | <i>Bacteroides uniformis</i> | 9.1107  |
| <i>Alistipes putredinis</i>         | 6.7517 | <i>Bacteroides vulgatus</i>  | 6.3990  |
| <i>Bacteroides vulgatus</i>         | 5.7016 | <i>Alistipes onderdonkii</i> | 6.0277  |
| <i>Faecalibacterium prausnitzii</i> | 5.4047 | <i>Alistipes putredinis</i>  | 5.0361  |

|                                     |        |                                     |        |
|-------------------------------------|--------|-------------------------------------|--------|
| <i>Bacteroides dorei</i>            | 3.9207 | <i>Bacteroides ovatus</i>           | 4.4489 |
| <i>Bacteroides ovatus</i>           | 3.3417 | <i>Faecalibacterium prausnitzii</i> | 4.2212 |
| <i>Bacteroides massiliensis</i>     | 3.3369 | <i>Bacteroides cellulosilyticus</i> | 3.8806 |
| <i>Bacteroides caccae</i>           | 3.0294 | <i>Bacteroides dorei</i>            | 2.9137 |
| <i>Bacteroides plebeius</i>         | 2.8978 | <i>Bacteroides caccae</i>           | 2.7306 |
| <i>Alistipes onderdonkii</i>        | 2.7979 | <i>Dialister invisus</i>            | 2.4613 |
| <i>Barnesiella intestinihominis</i> | 2.5968 | <i>Bacteroides massiliensis</i>     | 2.1281 |
| <i>Parabacteroides merdae</i>       | 2.2584 | <i>Bacteroides fragilis</i>         | 2.1123 |
| <i>Dialister invisus</i>            | 2.1834 | <i>Bacteroides stercoris</i>        | 2.1052 |
| <i>Bacteroides cellulosilyticus</i> | 1.8241 | <i>Alistipes finegoldii</i>         | 1.5904 |
| <i>Sutterella wadsworthensis</i>    | 1.6737 | <i>Akkermansia muciniphila</i>      | 1.5705 |
| <i>Alistipes shahii</i>             | 1.5342 | <i>Bacteroides thetaiotaomicron</i> | 1.5166 |
| <i>Bacteroides fragilis</i>         | 1.3903 | <i>Alistipes shahii</i>             | 1.3599 |
| <i>Bacteroides thetaiotaomicron</i> | 1.3552 | <i>Barnesiella intestinihominis</i> | 1.3320 |
| <i>Bacteroides stercoris</i>        | 1.1828 | <i>Parabacteroides merdae</i>       | 1.1630 |

Abbreviations: AVD, average value distribution; ASD, autism spectrum disorder; CN, control.

**Supplementary Table S5.** Most increased species and their strains % distribution.

| Species                                    | AVD-CN   | AVD-ASD | % Increase | LpxA  | LpxC  | LpxD  | LpxH  | LpxB  | LpxK  | WaaA  | LpxL  | LpxM  |
|--------------------------------------------|----------|---------|------------|-------|-------|-------|-------|-------|-------|-------|-------|-------|
| <i>Klebsiella oxytoca</i>                  | 0.0005   | 0.0377  | 6253       | 6.91  | 40.91 | 90.91 | 51.85 | 92.86 | 100   | 100   | 32.43 | 35.14 |
| <i>Bacteroides clarus</i>                  | 0.0205   | 0.6414  | 3020       | 1.67  | 100   | 100   | 0     | 33.33 | 100   | 0     | 0     | 0     |
| <i>Acidaminococcus fermentans</i>          | 8.86E-05 | 0.0026  | 2931       | 21.43 | 66.67 | 66.67 | 0     | 66.67 | 66.67 | 0     | 0     | 0     |
| <i>Escherichia unclassified</i>            | 0.0027   | 0.0558  | 1964       | 5.2   | 46.58 | 86.75 | 51.16 | 97.23 | 100   | 100   | 32.38 | 51.16 |
| <i>Bacteroides intestinalis</i>            | 0.0480   | 0.6447  | 1243       | 1.41  | 1     | 1     | 0     | 47.06 | 85.71 | 0     | 0     | 0     |
| <i>Klebsiella pneumoniae</i>               | 0.0125   | 0.1259  | 904        | 7.21  | 68.35 | 98.7  | 63.56 | 92.22 | 100   | 92.11 | 50.27 | 28.48 |
| <i>Bacteroides faecis</i>                  | 0.0770   | 0.7648  | 892        | 3.7   | 100   | 100   | 0     | 33.33 | 60    | 0     | 0     | 0     |
| <i>Citrobacter freundii</i>                | 0.0003   | 0.0024  | 602        | 8.57  | 36    | 87.5  | 50    | 48.39 | 92.5  | 100   | 56.9  | 64.91 |
| <i>Haemophilus sputorum</i>                | 0.0031   | 0.0107  | 245        | 16.67 | 50    | 100   | 100   | 100   | 100   | 0     | 50    | 50    |
| <i>Desulfovibrio piger</i>                 | 0.0179   | 0.0550  | 207        | 0     | 0     | 0     | 0     | 0     | 0     | 0     | 0     | 0     |
| <i>Oxalobacter formigenes</i>              | 0.0014   | 0.0042  | 202        | 10    | 50    | 100   | 100   | 100   | 100   | 0     | 0     | 0     |
| <i>Alistipes unclassified</i>              | 0.1135   | 0.3160  | 178        | 3.08  | 93.02 | 95.45 | 4.26  | 48.89 | 95.35 | 100   | 0     | 0     |
| <i>Phascolarctobacterium succinatutens</i> | 0.2166   | 0.5515  | 155        | 15.79 | 100   | 100   | 0     | 100   | 100   | 0     | 0     | 0     |
| <i>Akkermansia muciniphila</i>             | 0.8059   | 1.5705  | 95         | 6.61  | 100   | 90    | 0     | 18.18 | 83.33 | 0     | 0     | 0     |
| <i>Bacteroides stercoris</i>               | 1.1828   | 2.1052  | 78         | 3.7   | 100   | 100   | 5.88  | 85.71 | 92.86 | 100   | 0     | 0     |
| <i>Bilophila wadsworthia</i>               | 0.0333   | 0.0559  | 68         | 12.5  | 100   | 100   | 0     | 100   | 100   | 0     | 0     | 0     |
| <i>Alistipes senegalensis</i>              | 0.0197   | 0.0327  | 66         | 0     | 0     | 0     | 0     | 0     | 0     | 0     | 0     | 0     |
| <i>Bilophila unclassified</i>              | 0.1884   | 0.2985  | 58         | 12.5  | 100   | 100   | 0     | 0     | 100   | 0     | 0     | 0     |
| <i>Bacteroides coprocola</i>               | 0.0460   | 0.0706  | 54         | 3.57  | 100   | 100   | 0     | 66.67 | 100   | 100   | 0     | 0     |
| <i>Bacteroides fragilis</i>                | 1.3903   | 2.1123  | 52         | 0.94  | 100   | 96.15 | 2     | 81.58 | 100   | 100   | 0     | 0     |

Abbreviations: AVD, average value distribution; ASD, autism spectrum disorder; CN, control.
